# Supplementary material
Source: PubMed Central journal article supplement (PMC491817)

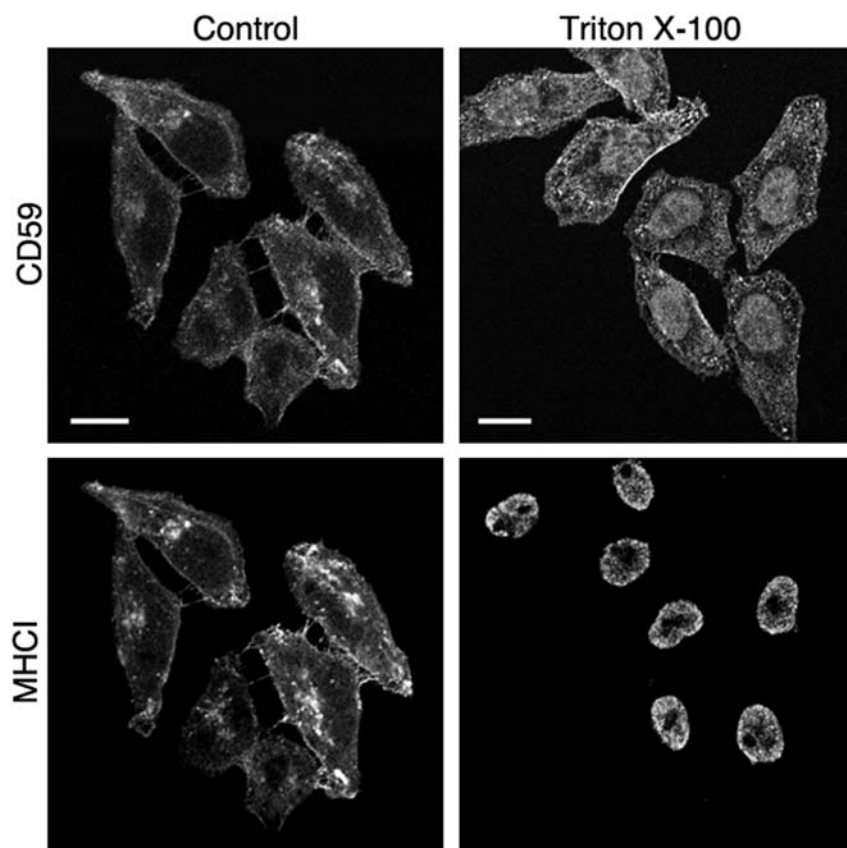

Supplement: mbc_15_8_3542__1.pdf [file mbc_15_8_3542__1.pdf]
